# Supplementary material
Source: publisher site journal article supplement (https://www.dovepress.com/article/360517)
Supplement: Supplementary file 1 [file get_supplementary_file.php]

**Appendix_1 Health Belief Model Scale**

| Subscales | Items |
| --- | --- |
| perceived susceptibility | If I don't exercise, I am likely to suffer from chronic diseases such as diabetes, stroke, and coronary heart disease. |
| If I don't exercise, I am more likely to suffer from chronic diseases such as diabetes, stroke, and coronary heart disease than others. |
| perceived severity | I think that being physically inactive is a serious issue, which will affect my physical health. |
| I think that a decline in my health will affect my normal social activities and life. |
| I think that a decline in physical health will increase the family burden. |
| perceived benefits | I think that the rational amount of every day is conductive to good health. |
| I belief that the regular exercise every day is beneficial to control chronic diseases. |
| I’m sure that the regular exercise every day is good for weight control |
| perceived barriers | I think I may fall or get hurt while exercising. |
| There are no suitable sports fields and facilities around me. |
| I think doing physical activity is a waste of time. |
| There are no relevant professionals to guide me on what to do and how I exercise. |
| cues to action | My friends always remind me to exercise |
| My family always remind me to exercise |
| My doctors always remind me to exercise |
| self-efficacy | I’m sure that I can find time to exercise |
| I’m sure that I can exercise every day even through nobody company with me |
| I’m sure that I can exercise every day |
